# Supplementary material for: CD8+CXCR5+T cells infiltrating hepatocellular carcinomas are activated and predictive of a better prognosis
Source: publisher site journal article supplement (doi:10.18632/aging.102308), 2019-10-30
Supplement: Supplementary file [file aging-v11i20-102308-supplementary-material-SD1.pdf]

**SUPPLEMENTARY FIGURE**

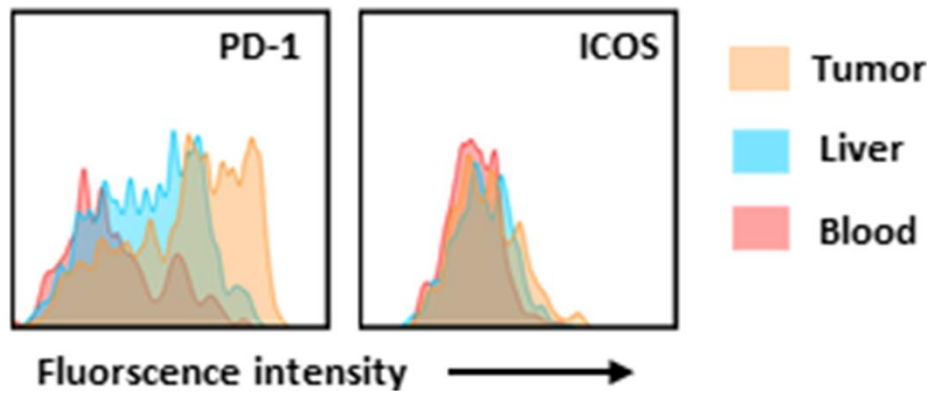

**Supplementary Figure 1.** PD-1 and ICOS expression by CD8+CXCR5+ T cells differed among the tumor tissue and matched peritumoral tissues and peripheral blood from the same patients.
