# Supplementary material for: CD8+CXCR5+T cells infiltrating hepatocellular carcinomas are activated and predictive of a better prognosis
Source: publisher site journal article supplement (doi:10.18632/aging.102308), 2019-10-30
Supplement: Supplementary file [file aging-v11i20-102308-supplementary-material-SD2.pdf]

## SUPPLEMENTARY TABLE

**Supplementary Table 1. Characteristics of the both study population.**

| <b>Variable</b>                         | <b>HCC (N=96)</b> | <b>HCC (N=40)</b> | <b>P value</b> |
|-----------------------------------------|-------------------|-------------------|----------------|
| Age (years old)                         | 49.70±10.944      | 50.80±11.164      | 0.477          |
| Gender (Male/ Female)                   | 87/9              | 35/5              | <0.005         |
| HBV-DNA (<1*e2 vs ≥1*e2)                | 19/77             | 18/22             | 0.626          |
| TNM Stage (I+II/III+IV)                 | 65/31             | 21/19             | 0.072          |
| Tumor Differentiation (I+II/III+IV)     | 54/42             | 26/14             | 0.345          |
| Tumor Multiplicity (multiple/ solitary) | 8/88              | 15/25             | <0.005         |
| Tumor Size, cm                          | 4.71±2.794        | 4.95±2.364        | 0.614          |
| Tumor Microvascular Invasion (No/Yes)   | 67/29             | 18/22             | <0.005         |
| AFP (<400/≥400)                         | 17/79             | 18/22             | <0.005         |

AFP: alpha-fetoprotein; TNM: tumor, node, metastases.
